# Supplementary material for: Synergetic modulation on multiple transition metals enables NiCoxZnyP(1+x+y)/2 microspheres for efficient lithium-ion storage
Source: Royal Society of Chemistry journal article supplement (doi:10.1039/d4ta05991c), 2024-01-01
Supplement: d4ta05991c1.pdf [file d4ta05991c1.pdf]

## Supporting information

### Synergetic modulation on multiple transition metals enables $\text{NiCo}_x\text{Zn}_y\text{P}_{(1+x+y)/2}$ microspheres for efficient lithium-ion storage

Wanying Zuo, Runhan Zhang, Yuxi Zou, Xiaoguang Fu, Zhibo Zhao, Bingqi Chen,  
Zibo Zhu, Hao Wang\*, and Meidan Ye\*

Research Institute for Biomimetics and Soft Matter, Fujian Provincial Key Lab for  
Soft Functional Materials Research, Department of Physics, College of Physical  
Science and Technology, Xiamen University, Xiamen 361005, China

\*Author to whom correspondence should be addressed: h\_wang@xmu.edu.cn,  
mdye@xmu.edu.cn

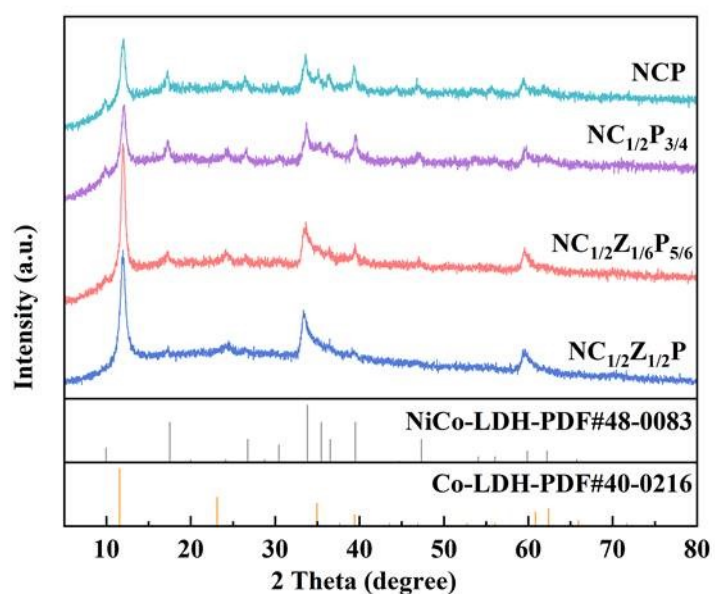

Figure S1. XRD patterns of different  $\text{NiCo}_x\text{Zn}_y$ -LDH samples.

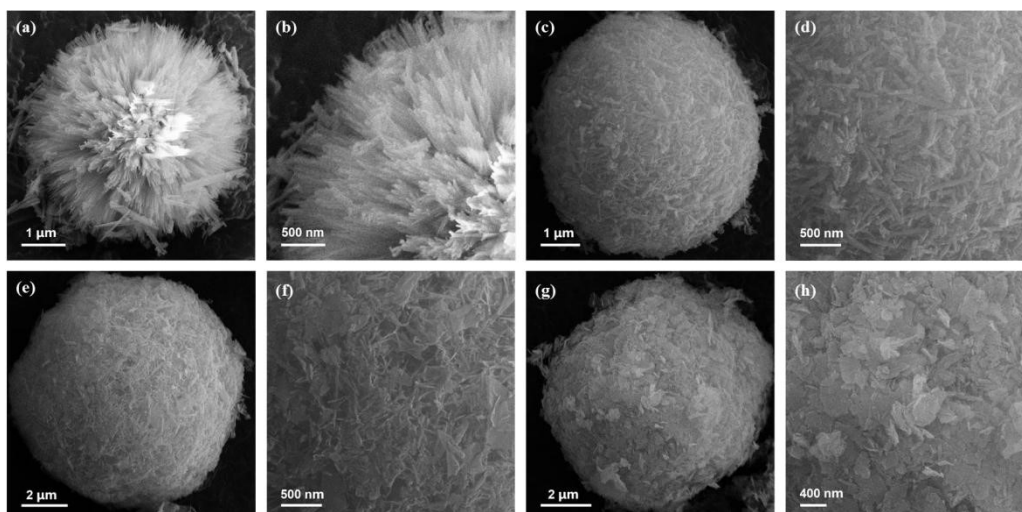

**Figure S2.** SEM images of (a-b) NiCo-LDH, (c-d) NiCo<sub>1/2</sub>-LDH, (e-f) NiCo<sub>1/2</sub>Zn<sub>1/6</sub>-LDH, and (g-h) NiCo<sub>1/2</sub>Zn<sub>1/2</sub>-LDH.

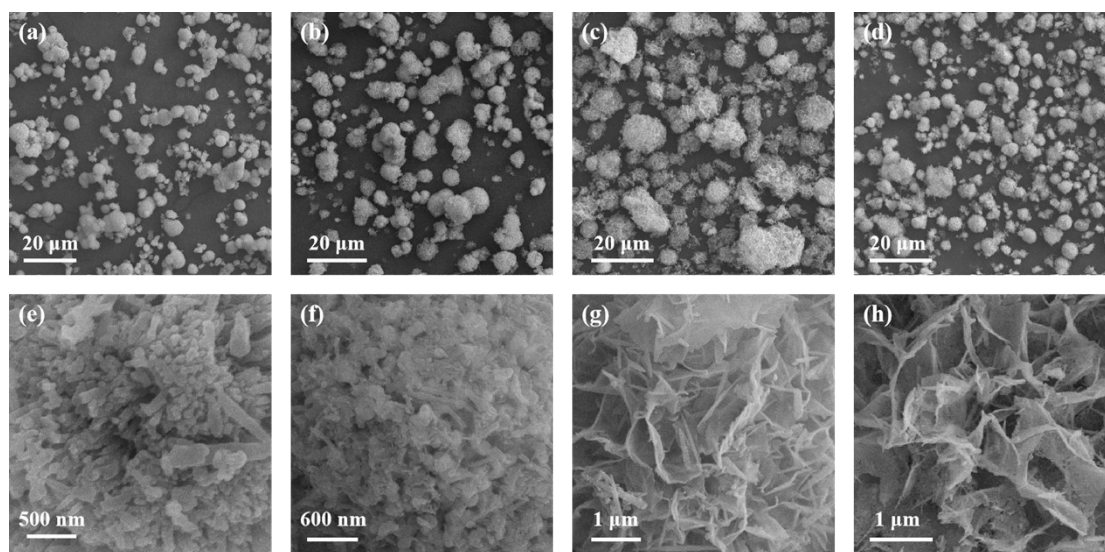

**Figure S3.** SEM images of (a, e) NiCoP, (b, f) NiCo<sub>1/2</sub>P<sub>3/4</sub>, (c, g) NiCo<sub>1/2</sub>Zn<sub>1/6</sub>P<sub>5/6</sub>, and (d, h) NiCo<sub>1/2</sub>Zn<sub>1/2</sub>P. (a-d) Low-resolution SEM images, and (e-h) high-resolution SEM images.

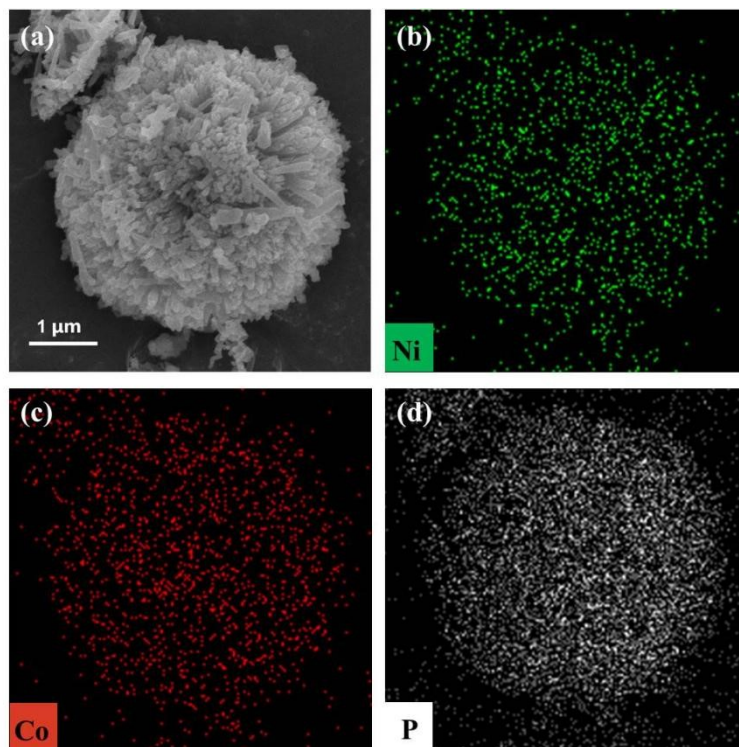

**Figure S4.** Elemental mappings of NiCoP.

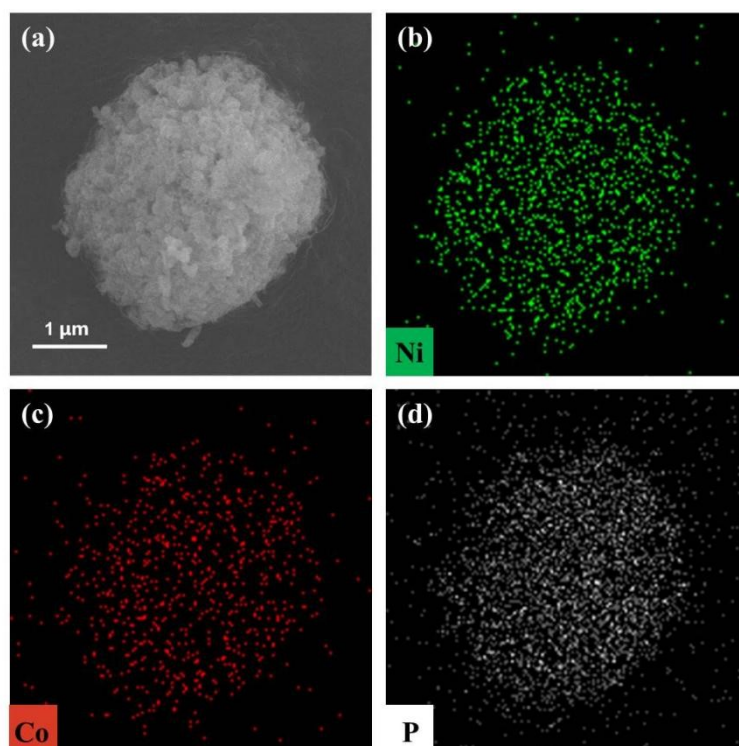

**Figure S5.** Elemental mappings of NiCo<sub>1/2</sub>P<sub>3/4</sub>.

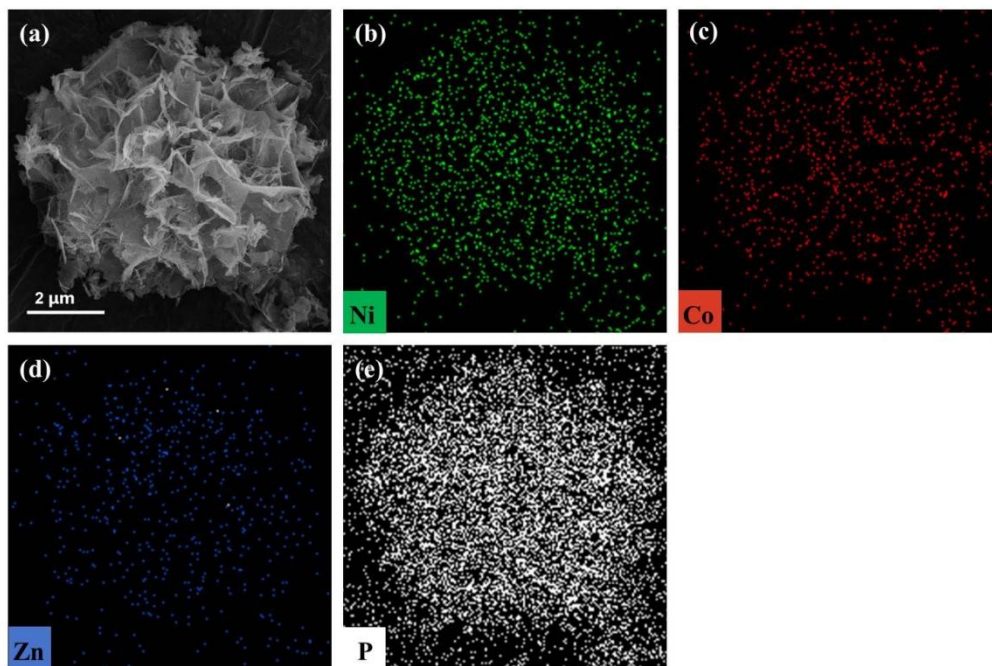

**Figure S6.** Elemental mappings of  $\text{NiCo}_{1/2}\text{Zn}_{1/2}\text{P}$ .

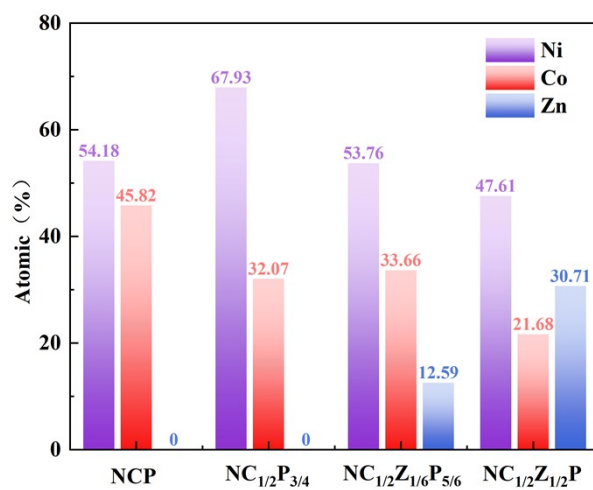

**Figure S7.** Metal element contents of  $\text{NiCo}_x\text{Zn}_y\text{P}_{(1+x+y)/2}$ .

**Table S1.** Metal and phosphorus element contents of  $\text{NiCo}_x\text{Zn}_y\text{P}_{(1+x+y)/2}$ .

| Materials                                     | Atomic (%) |       |       |       |
|-----------------------------------------------|------------|-------|-------|-------|
|                                               | Ni         | Co    | Zn    | P     |
| NCP                                           | 29.04      | 24.56 | —     | 46.40 |
| $\text{NC}_{1/2}\text{P}_{3/4}$               | 39.82      | 18.80 | —     | 41.38 |
| $\text{NC}_{1/2}\text{Z}_{1/6}\text{P}_{5/6}$ | 27.12      | 16.98 | 6.35  | 49.55 |
| $\text{NC}_{1/2}\text{Z}_{1/2}\text{P}$       | 27.62      | 12.58 | 17.82 | 41.98 |

**Table S2.** Summary of BET results.

| Materials                                           | BET surface area ( m <sup>2</sup> g <sup>-1</sup> ) | Average pore diameter (nm) |
|-----------------------------------------------------|-----------------------------------------------------|----------------------------|
| NCP                                                 | 31.96                                               | 10.29                      |
| NC <sub>1/2</sub> P <sub>3/4</sub>                  | 22.15                                               | 10.53                      |
| NC <sub>1/2</sub> Z <sub>1/6</sub> P <sub>5/6</sub> | 37.05                                               | 11.47                      |
| NC <sub>1/2</sub> Z <sub>1/2</sub> P                | 42.77                                               | 11.99                      |

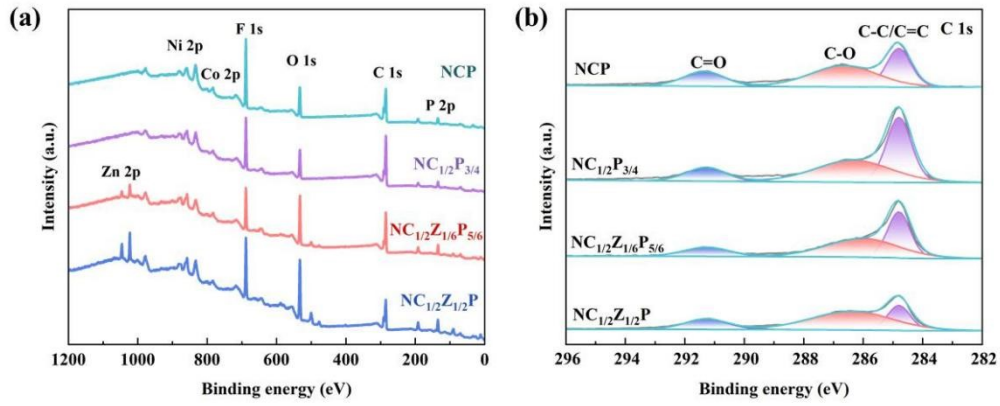

**Figure S8.** XPS analysis of NiCo<sub>x</sub>Zn<sub>y</sub>P<sub>(1+x+y)/2</sub> (NC<sub>x</sub>Z<sub>y</sub>P<sub>(1+x+y)/2</sub>) samples. (a) Full spectra, (b) high-resolution spectra of C 1s.

The calculation of  $D_{Li^+}$  values from the EIS results:

$$w = 2\pi f \quad \text{S(1)}$$

$$Z_w = R + \sigma_w w^{-1/2} \quad \text{S(2)}$$

where  $w$  and  $f$  are the angular frequency and frequency,  $\sigma_w$  is the Warburg factor that can be fitted through the slope of  $Z_w - w^{-1/2}$ .

$$D_{Li^+} = \frac{R^2 T^2}{2A^2 n^4 F^4 C^2 \sigma_w^2} \quad \text{S(3)}$$

$D_{Li^+}$  is the Li<sup>+</sup> diffusion coefficient,  $A$  is the surface area of the electrode (1.13 cm<sup>2</sup>),  $R$  is the gas constant,  $T$  is absolute temperature,  $n$  is the number of electrons per molecule during the reaction,  $F$  is the concentration of Li<sup>+</sup> and  $C$  is the Faraday constant, respectively.<sup>1</sup>

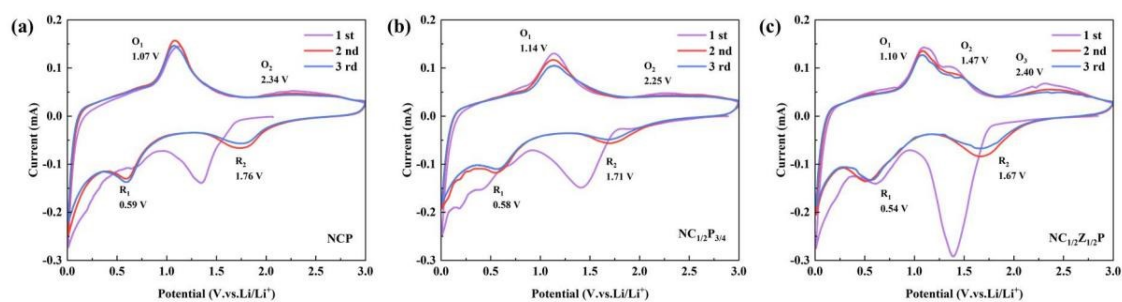

**Figure S9.** CV curves at  $0.1 \text{ mV s}^{-1}$ . (a) NiCoP, (b)  $\text{NiCo}_{1/2}\text{P}_{3/4}$ , and (c)  $\text{NiCo}_{1/2}\text{Zn}_{1/2}\text{P}$ .

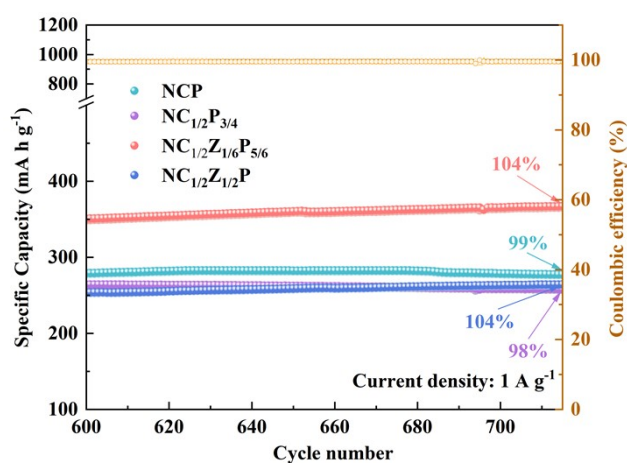

**Figure S10.** The cycling performance of  $\text{NiCo}_x\text{Zn}_y\text{P}_{(1+x+y)/2}$  ( $\text{NC}_x\text{Z}_y\text{P}_{(1+x+y)/2}$ ) electrode-based LIBs at  $1.0 \text{ A g}^{-1}$  (details of the 600-715 cycles in **Figure 6d**).

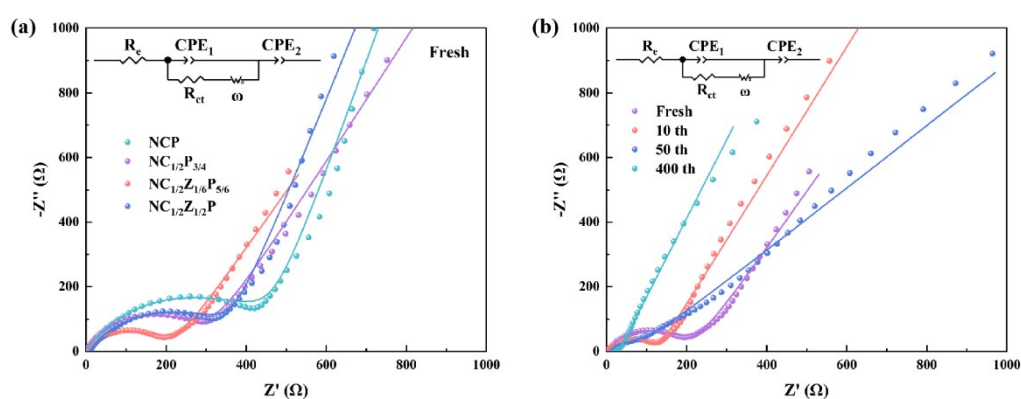

**Figure S11.** Electrochemical performance of  $\text{NiCo}_x\text{Zn}_y\text{P}_{(1+x+y)/2}$  ( $\text{NC}_x\text{Z}_y\text{P}_{(1+x+y)/2}$ ). (a) Nyquist plots of fresh LIBs (dots: raw data; lines: fitting data), (b) Nyquist plots after different cycles (dots: raw data; lines: fitting data) of  $\text{NiCo}_{1/2}\text{Zn}_{1/6}\text{P}_{5/6}$  electrode-based LIBs.

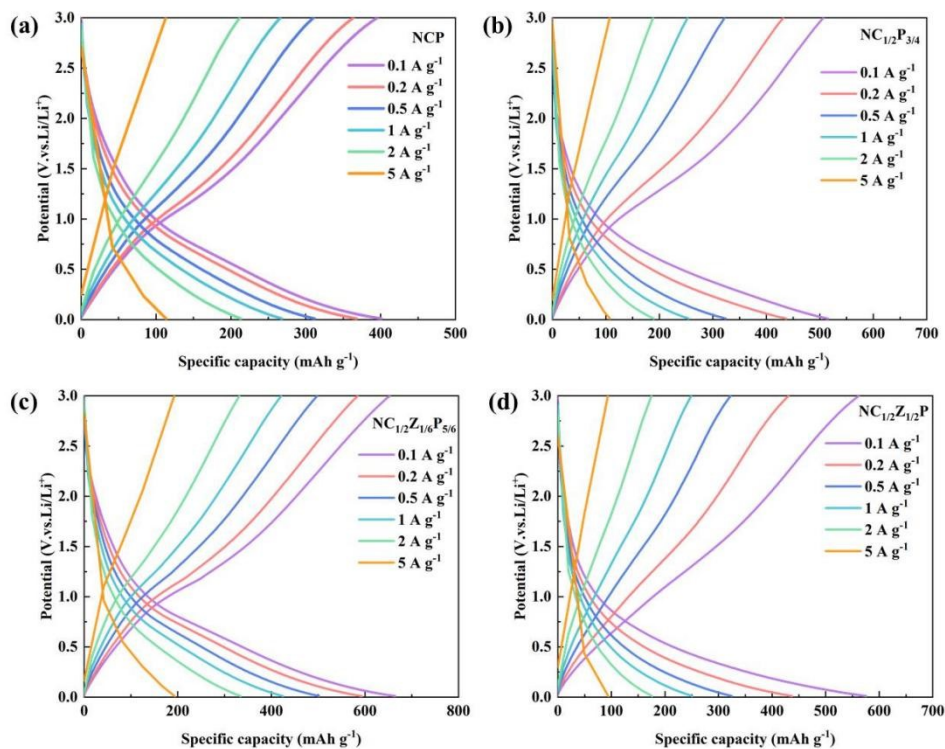

**Figure S12.** Charge-discharge curves at different current densities. (a) NiCoP, (b) NiCo<sub>1/2</sub>P<sub>3/4</sub>, (c) NiCo<sub>1/2</sub>Zn<sub>1/6</sub>P<sub>5/6</sub>, and (d) NiCo<sub>1/2</sub>Zn<sub>1/2</sub>P.

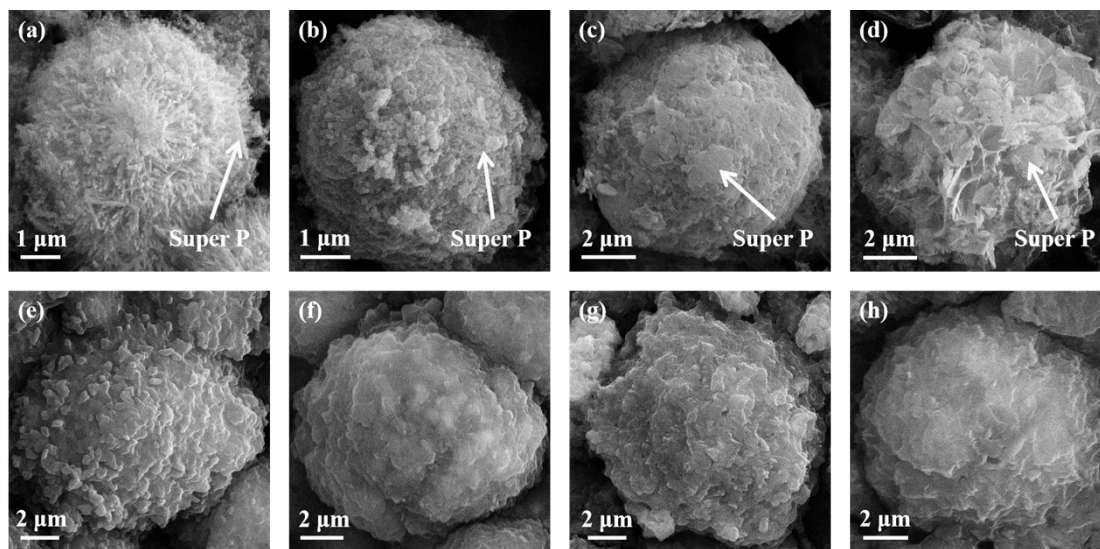

**Figure S13.** Ex-situ SEM images of (a,e) NiCoP, (b,f) NiCo<sub>1/2</sub>P<sub>3/4</sub>, (c,g) NiCo<sub>1/2</sub>Zn<sub>1/6</sub>P<sub>5/6</sub>, and (d,h) NiCo<sub>1/2</sub>Zn<sub>1/2</sub>P. (a-d) fresh electrode plates, and (e-h) electrode plates after 400 cycles.

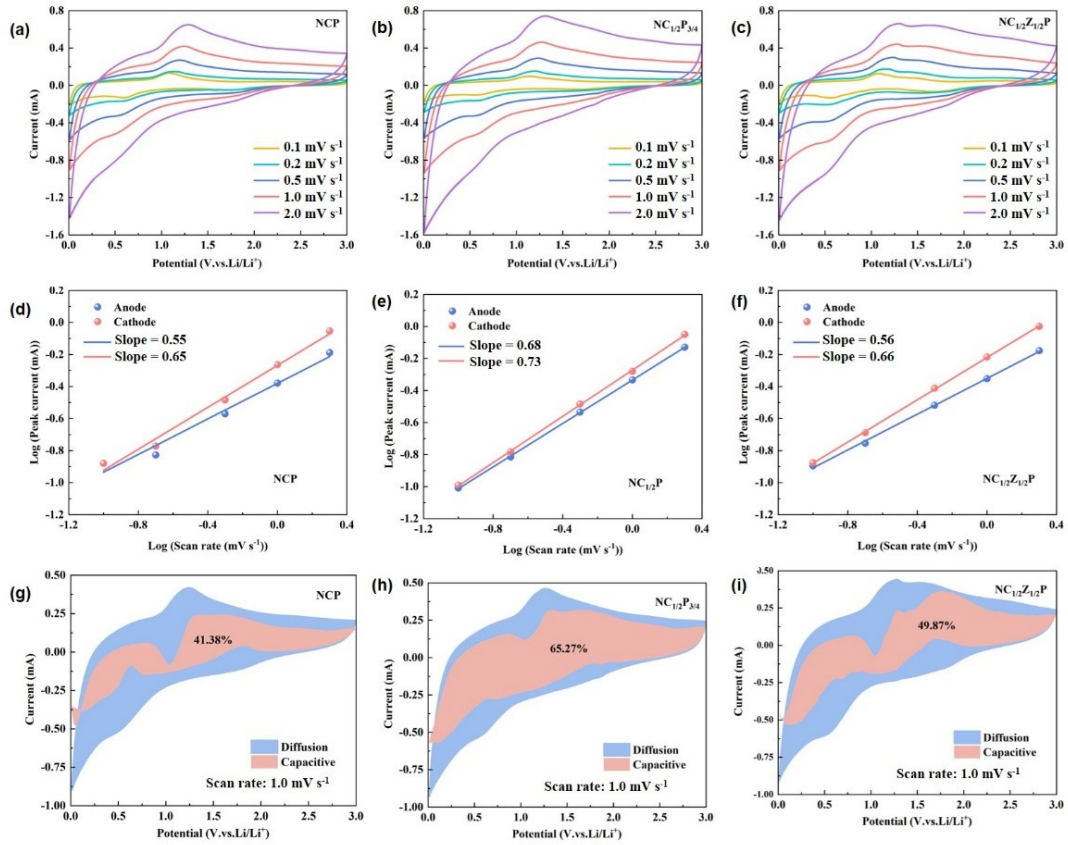

**Figure S14.** Electrochemical characterizations and behavior analysis of  $\text{NiCo}_x\text{Zn}_y\text{P}_{(1+x+y)/2}$  electrodes. (a-c) CV curves at different scan rates, (d-f) fitting plots of the peak current and scan rate, (g-i) capacitive and diffusion-controlled charge storage contributions at  $1.0 \text{ mV s}^{-1}$ : (a, d, g)  $\text{NiCoP}$ , (b, e, h)  $\text{NiCo}_{1/2}\text{P}_{3/4}$ , and (c, f, i)  $\text{NiCo}_{1/2}\text{Zn}_{1/2}\text{P}$ .

**Table S3.** LIBs performance of  $\text{NiCoP}$  electrodes reported in the literature

| Material                                 | Current density ( $\text{A g}^{-1}$ ) | Specific capacity ( $\text{mAh g}^{-1}$ ) | Cycle number | Ref. |
|------------------------------------------|---------------------------------------|-------------------------------------------|--------------|------|
| $\text{Co}_2\text{P QDs/NPC}$            | 1.0                                   | 431.2                                     | 1600         | 2    |
| $\text{CoP@C/C-0.5}$                     | 0.2                                   | 638.8                                     | 500          | 3    |
| $\text{Ni/Ni}_2\text{P@C-NCNTs}$         | 0.1                                   | 659.8                                     | 170          | 4    |
| $\text{Co}_x\text{P@NC}$                 | 1.0                                   | 526                                       | 600          | 5    |
| $\text{P-NiCoP-NC-600}$                  | 0.1                                   | 858.5                                     | 120          | 6    |
| $\text{CoP@C@PCF/NCNT}$                  | 0.2                                   | 577                                       | 140          | 7    |
| s                                        |                                       |                                           |              |      |
| $\text{NiCoP}$                           | 0.1                                   | 567                                       | 400          | 8    |
| $\text{Ni}_{1.2}\text{Co}_{0.8}\text{P}$ | 1.0                                   | 260                                       | 3000         | 9    |
| $\text{Ni}_2\text{P@pGN}$                | 0.1                                   | 514                                       | 250          | 10   |



|                                                          |     |     |       |              |
|----------------------------------------------------------|-----|-----|-------|--------------|
| <b>NiCo<sub>1/2</sub>Zn<sub>1/6</sub>P<sub>5/6</sub></b> | 0.2 | 624 | 400   | This<br>work |
|                                                          | 1.0 | 292 | 2000  |              |
|                                                          | 5.0 | 145 | 10000 |              |

## References

1. S. Li, Y. Liu, X. Zhao, Q. Shen, W. Zhao, Q. Tan, N. Zhang, P. Li, L. Jiao and X. Qu, *Adv. Mater.*, 2021, **33**, 2007480.
2. X. D. Ma, C. Ji, X. Y. Yu, Y. K. Liu and X. H. Xiong, *ACS Appl. Mater. Intergaces*, 2021, **13**, 53965-53973.
3. H. Su, Y. Zhang, X. F. Liu, F. B. Fu, J. R. Ma, K. Li, W. B. Zhang, J. M. Zhang and D. Li, *J. Colloid Interface Sci.*, 2021, **582**, 969-976.
4. Y. R. Jiang, L. Zhao, H. N. Guo, C. H. An, M. Y. Yue, C. Liu and Y. J. Wang, *J. Energy Storage*, 2023, **64**, 107146.
5. Y. Liu, X. Que, X. Wu, Q. Yuan, H. Wang, J. Wu, Y. Gui and W. Gan, *Mater. Today Chem.*, 2020, **17**, 100284.
6. G. R. Ou, M. Y. Huang, X. M. Lu, I. Manke, C. Yang, J. Qian, X. M. Lin and R. J. Chen, *Small*, 2024, **20**, 2307615.
7. K. K. Guo, B. J. Xi, R. C. Wei, H. B. Li, J. K. Feng and S. L. Xiong, *Adv. Energy Mater.*, 2020, **10**, 1902913.
8. F. F. Li, J. F. Gao, Z. H. He and L. B. Kong, *J. Colloid Interface Sci.*, 2021, **598**, 283-301.
9. F. F. Li, J. F. Gao, Z. H. He, N. Brandon, X. H. Li and L. B. Kong, *Energy Storage Mater.*, 2022, **48**, 20-34.
10. C. Wu, P. Kopold, P. A. van Aken, J. Maier and Y. Yu, *Adv. Mater.*, 2017, **29**, 1604015.
